# Supplementary material for: All optical dynamic nanomanipulation with active colloidal tweezers
Source: PubMed Central journal article supplement (PMC6744401; doi:10.1038/s41467-019-12217-2), 2019-09-13
Supplement: 41467_2019_12217_MOESM3_ESM.pdf [file 41467_2019_12217_MOESM3_ESM.pdf]

## Description of Additional Supplementary Files

**File name:** Supplementary Movie 1

**Description:** Trapping of 100 nm fluorescent nanodiamonds by an ACT.

**File name:** Supplementary Movie 2

**Description:** Demonstration of trap, transport and release of a 200 nm fluorescent polystyrene particle in ionic solution. Video played at 2X of original speed.

**File name:** Supplementary Movie 3

**Description:** Demonstration of trapping of 400 nm polystyrene particle in vertical configuration.

**File name:** Supplementary Movie 4

**Description:** Demonstration of trapping of 400 nm polystyrene particle in horizontal configuration.

**File name:** Supplementary Movie 5

**Description:** Collective manipulation of 400 nm polystyrene particle using multiple ACTs using a defocused optical tweezer. Video played at 0.5X of original speed.

**File name:** Supplementary Movie 6

**Description:** Demonstration of trapping of 40 nm fluorescent polystyrene particle in vertical configuration.

**File name:** Supplementary Movie 7

**Description:** Demonstration of trapping of 40 nm fluorescent polystyrene particle by an ACT attached to substrate (in horizontal configuration).

**File name:** Supplementary Movie 8

**Description:** Demonstration of parallel and independent control in manipulation using 300 nm fluorescent magnetic particle.
